# Supplementary material
Source: Research Square preprint supplement (doi:10.21203/rs.3.rs-9885038/v1)
Supplement: Supplementary file 1 [file f407212c82c21f84ee6a0629.docx]

**Supporting Information**

**Construction of Waterborne Polyurethane Composites via Phytate-Chitosan-Modied Boron Nitride and DOPO Derivative Synergy: A route to flame retardancy and multifunctional performance**

Yanling Yue1, Bingyue Huang1, Deyu Liu1, Shaoyuan Wu1, Jinghan Hu1, Shiyi Ming1, Xingyu Guan1,Yi Zhang1*, Kui Wang1, Weijiang Huang1, Wei Yan1*

1. School of Materials Science and Engineering, Guiyang University, Guiyang 550005, P.R. China

Corresponding author: [yikizhang1991@163.com，](mailto:yikizhang1991@163.com，)yw2410@gyu.edu.cn

**
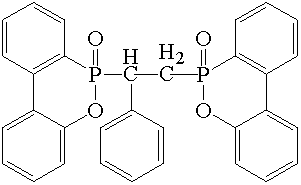
**

**Fig.S1.** DIDOPO structural formula.


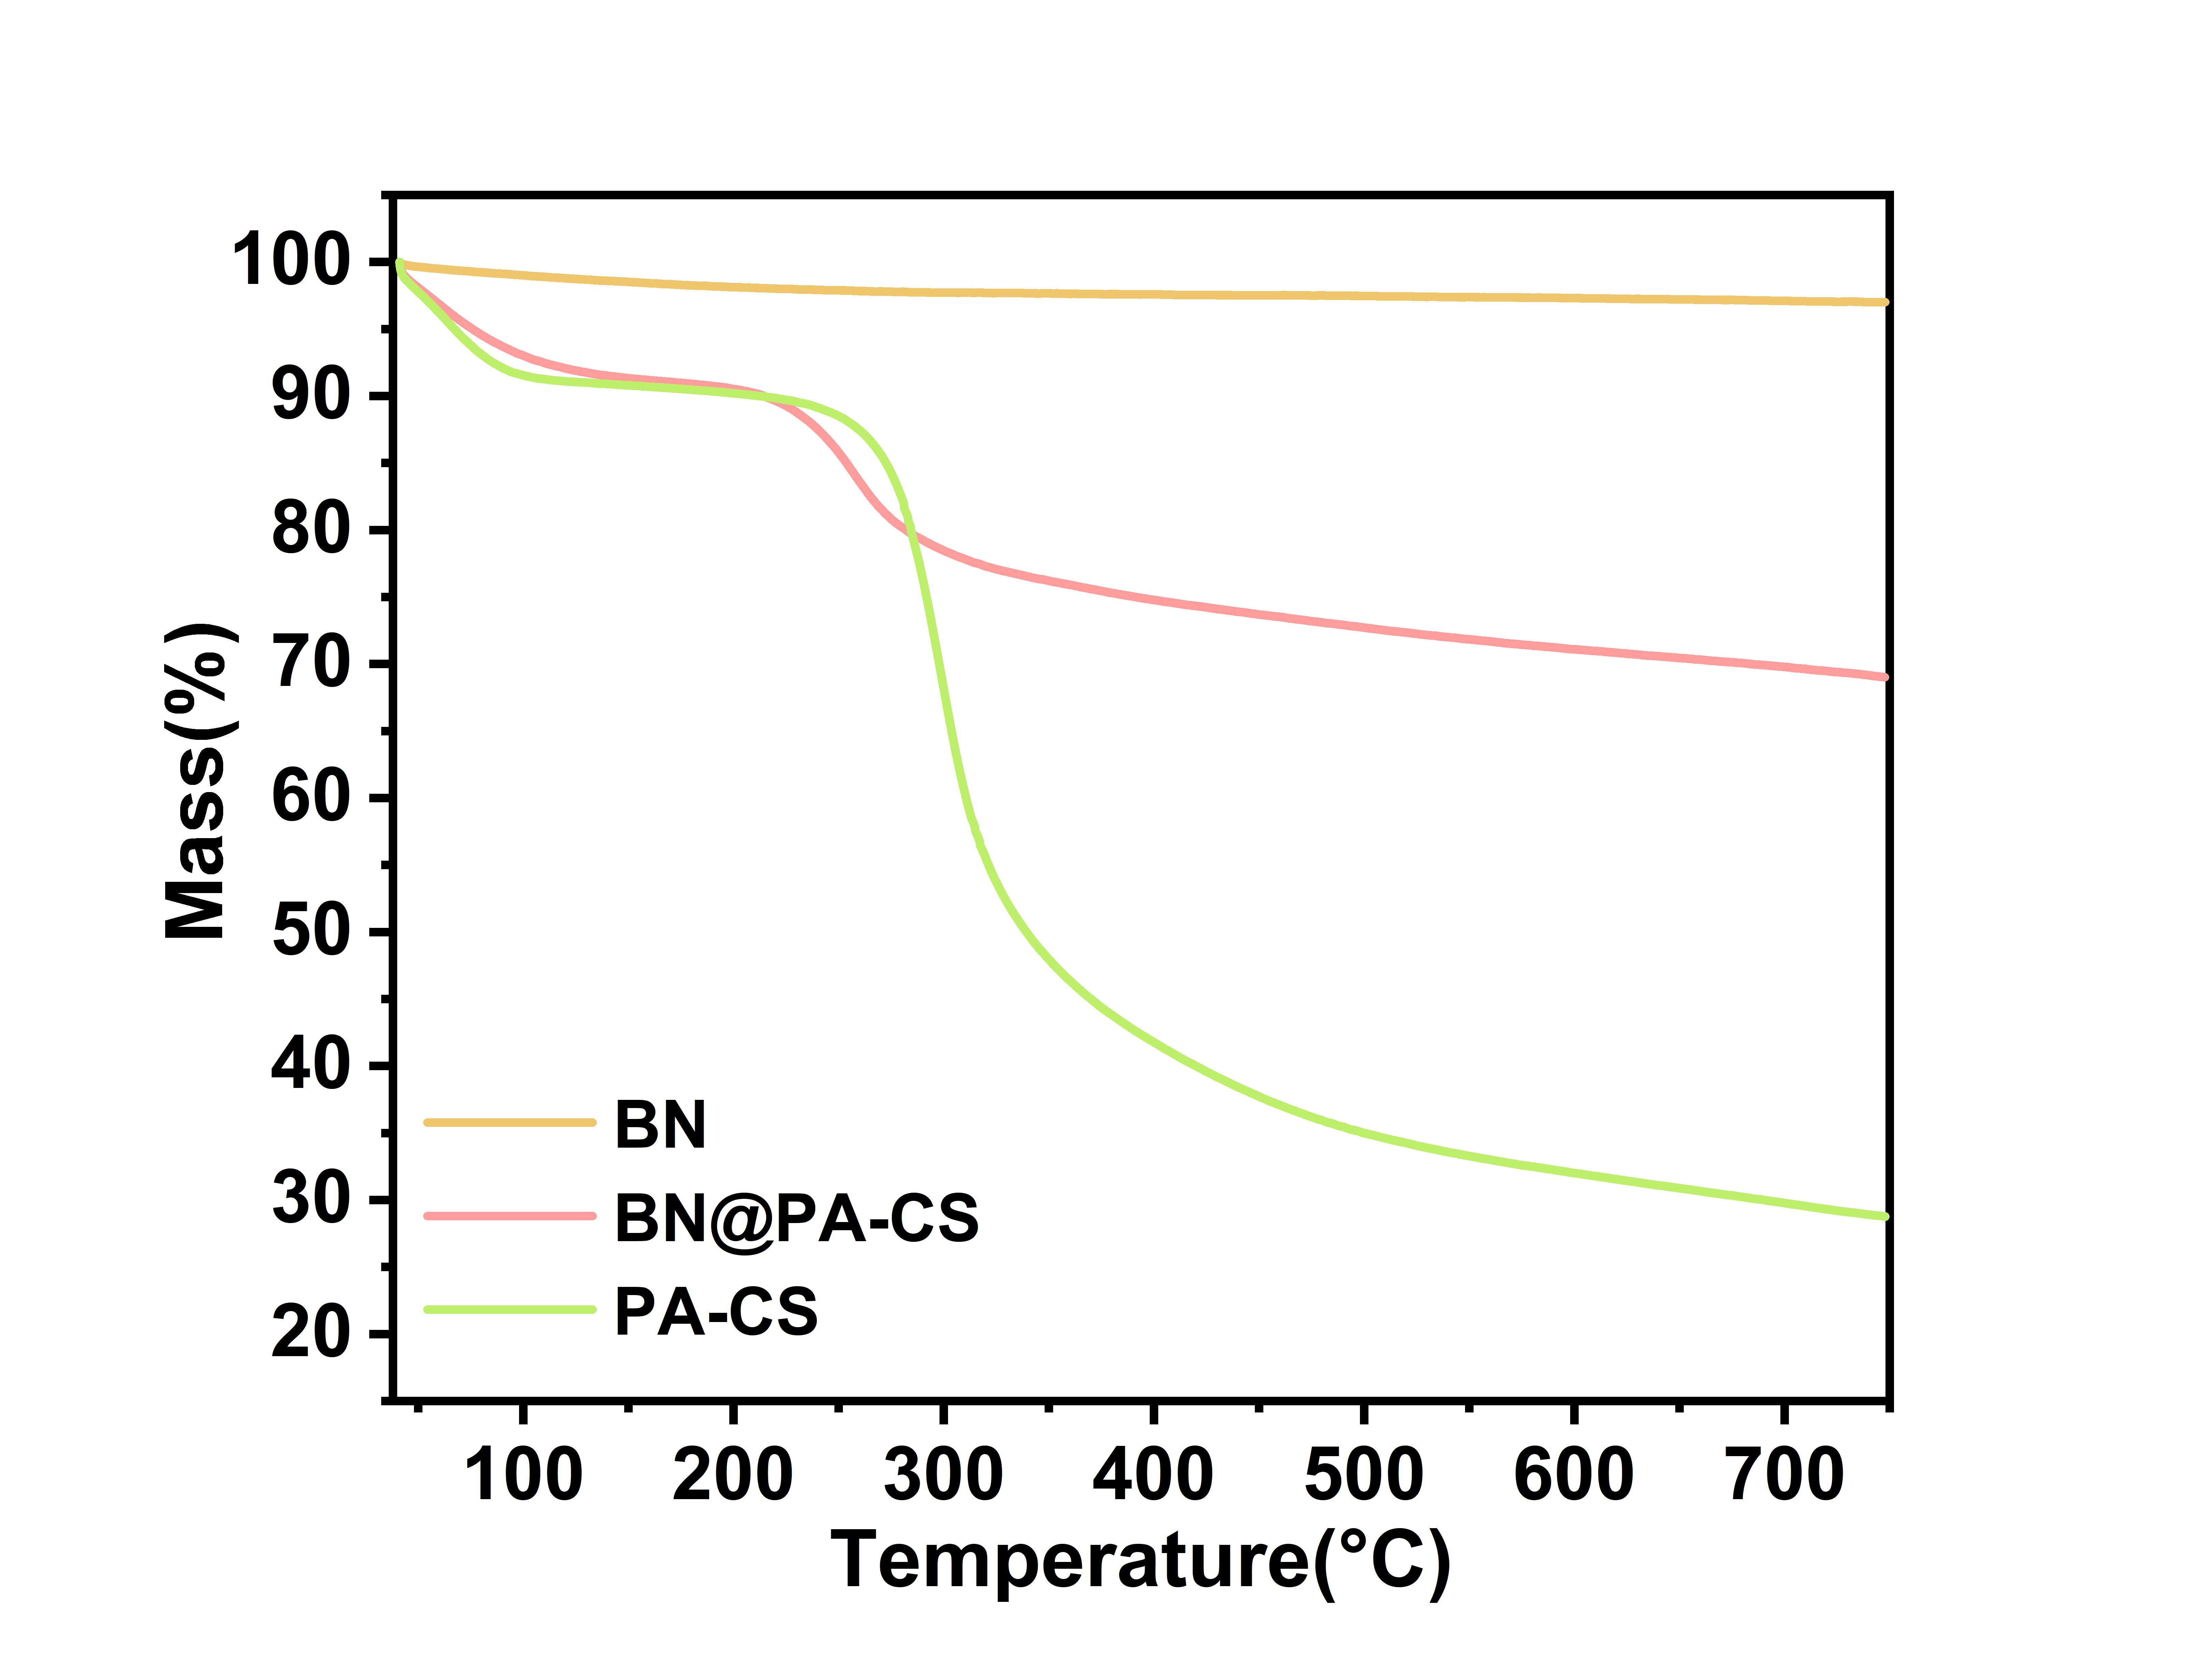


Fig. S2 shows the TGA curves of BN, BN@PA-CS, and PA-CS.

| 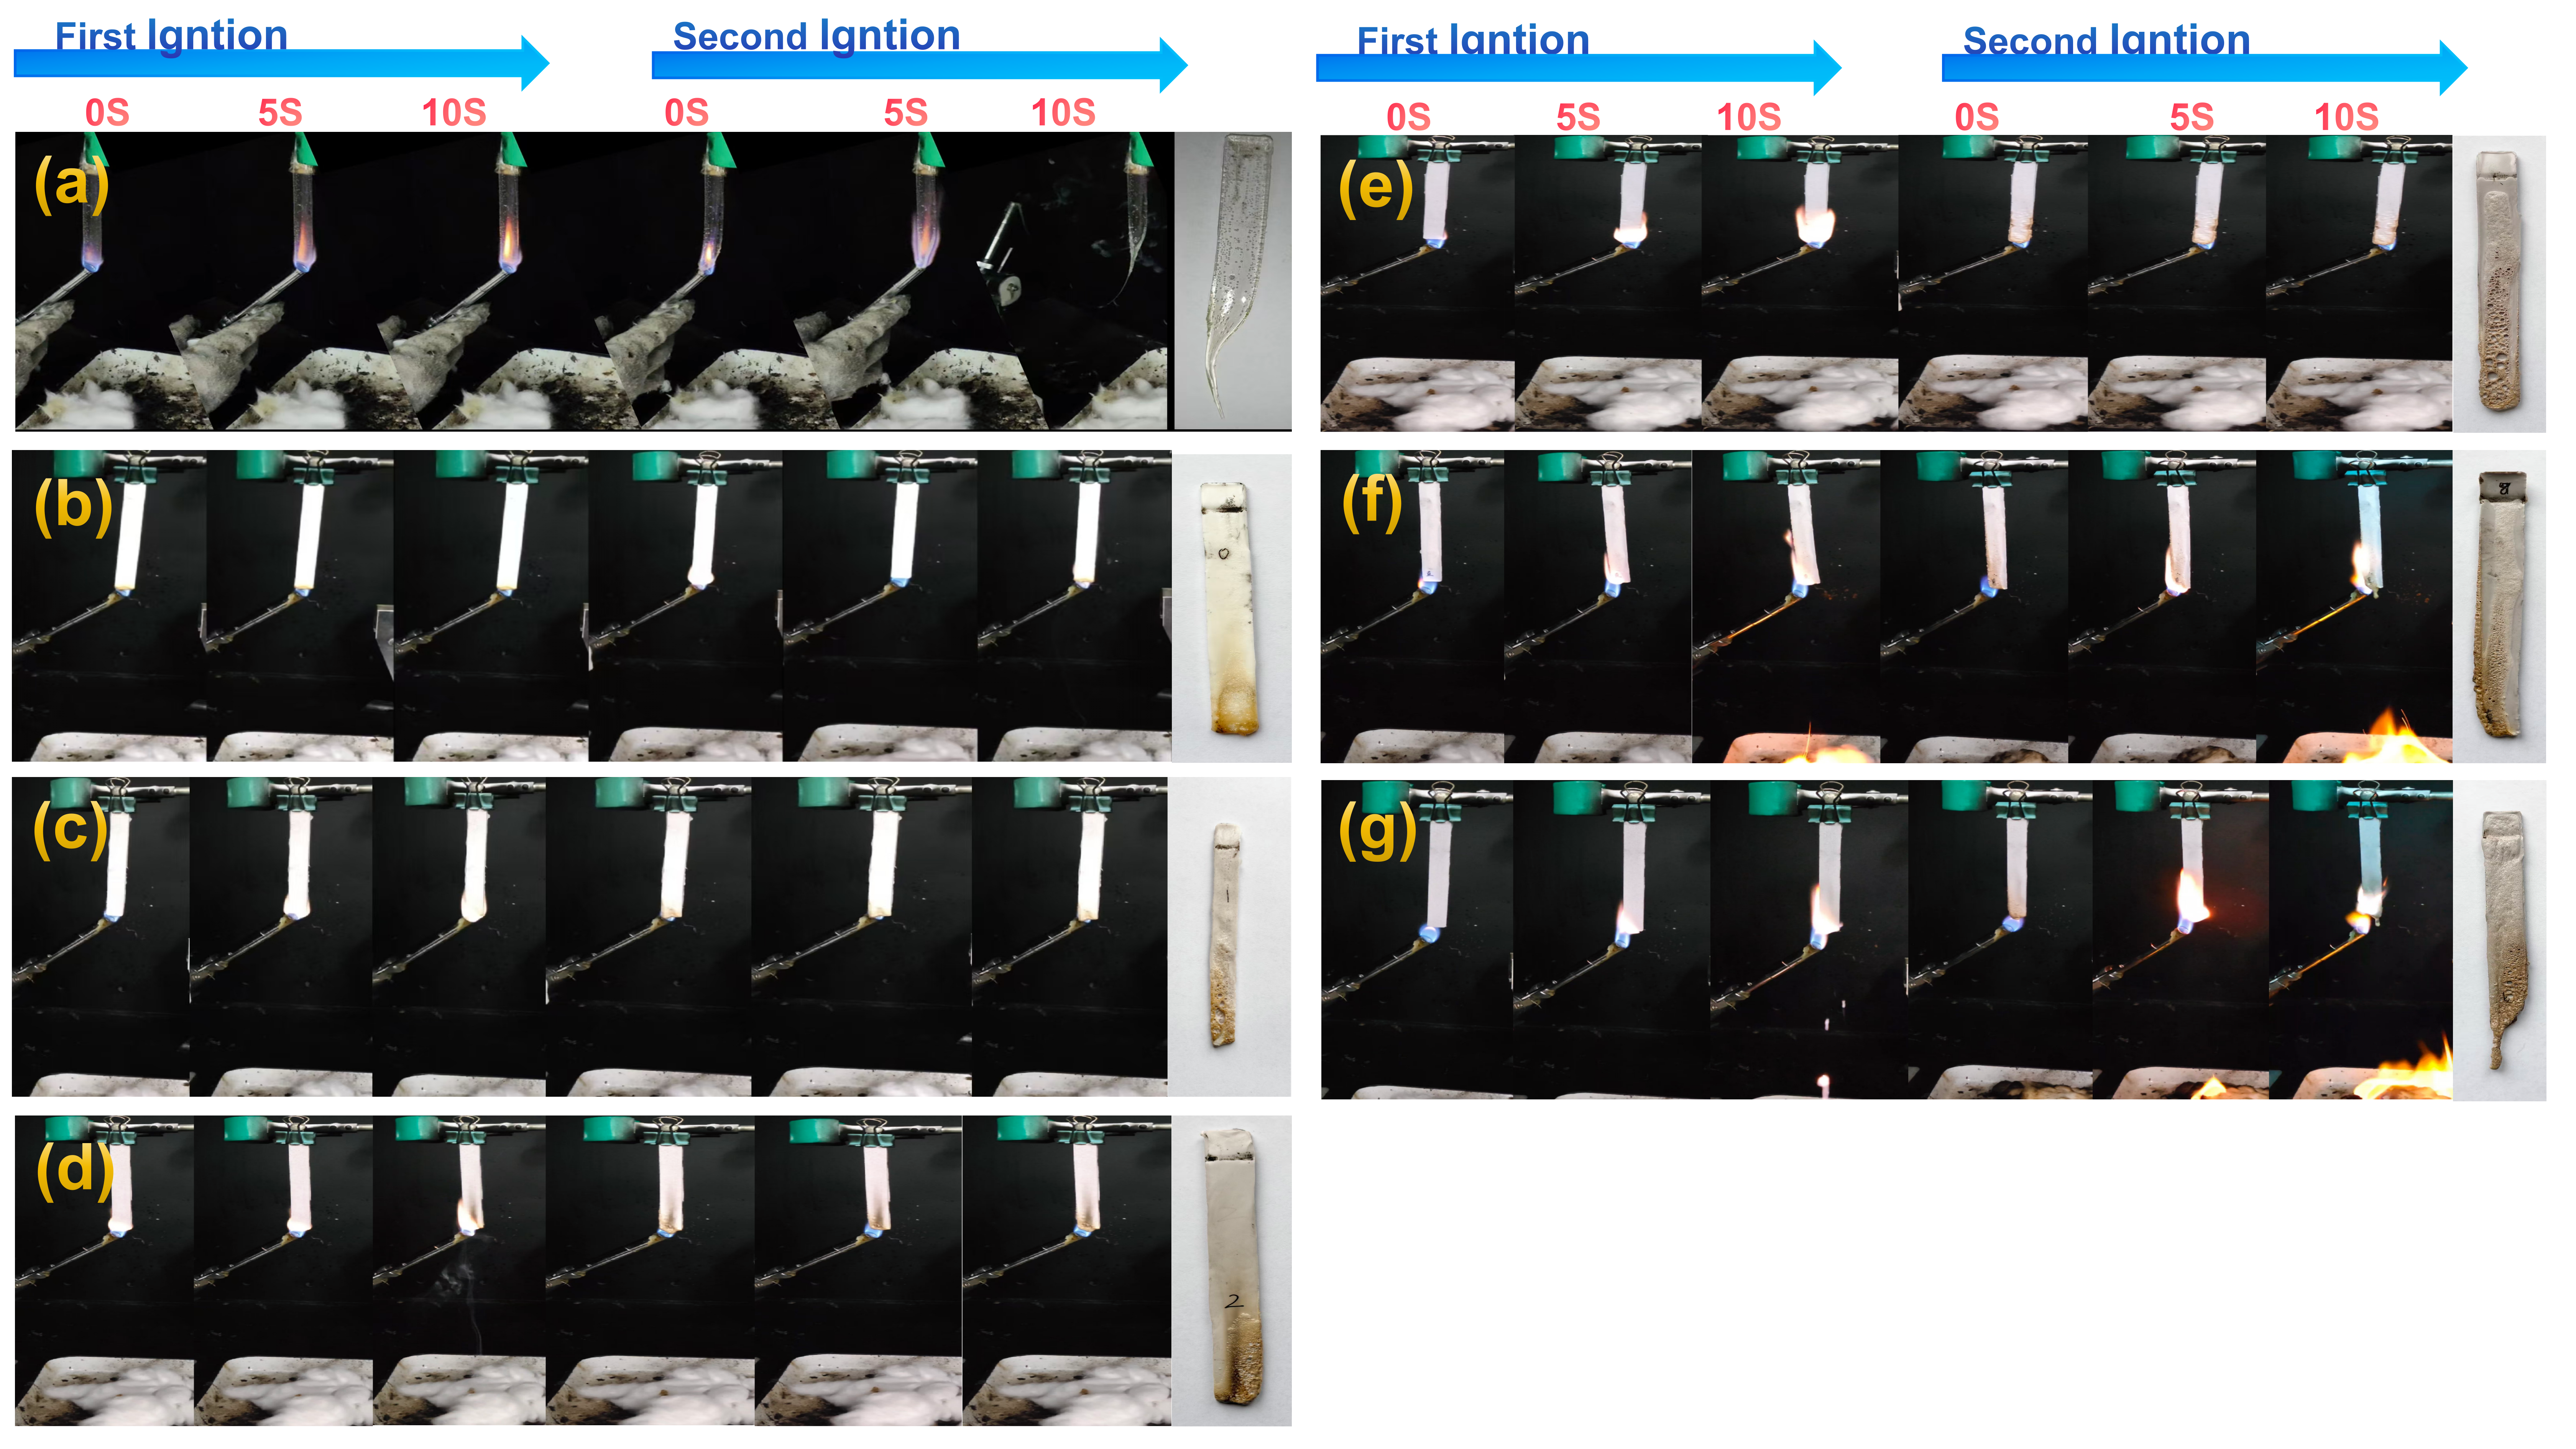 |
| --- |
| (a) wpu,  (b)WPU/DIDOPO9, (c) WPU/BN@PA-CS1/DIDOPO8, (d)WPU/BN@PA-CS2/DIDOPO7  (e) WPU/BN@PA-CS7/DIDOPO2,(f) WPU/BN@PA-CS8/DIDOPO1,(g)WPU/BN@PA-CS9 |

Fig. S3.The photos of the vertical burning test with WPU composites.

| 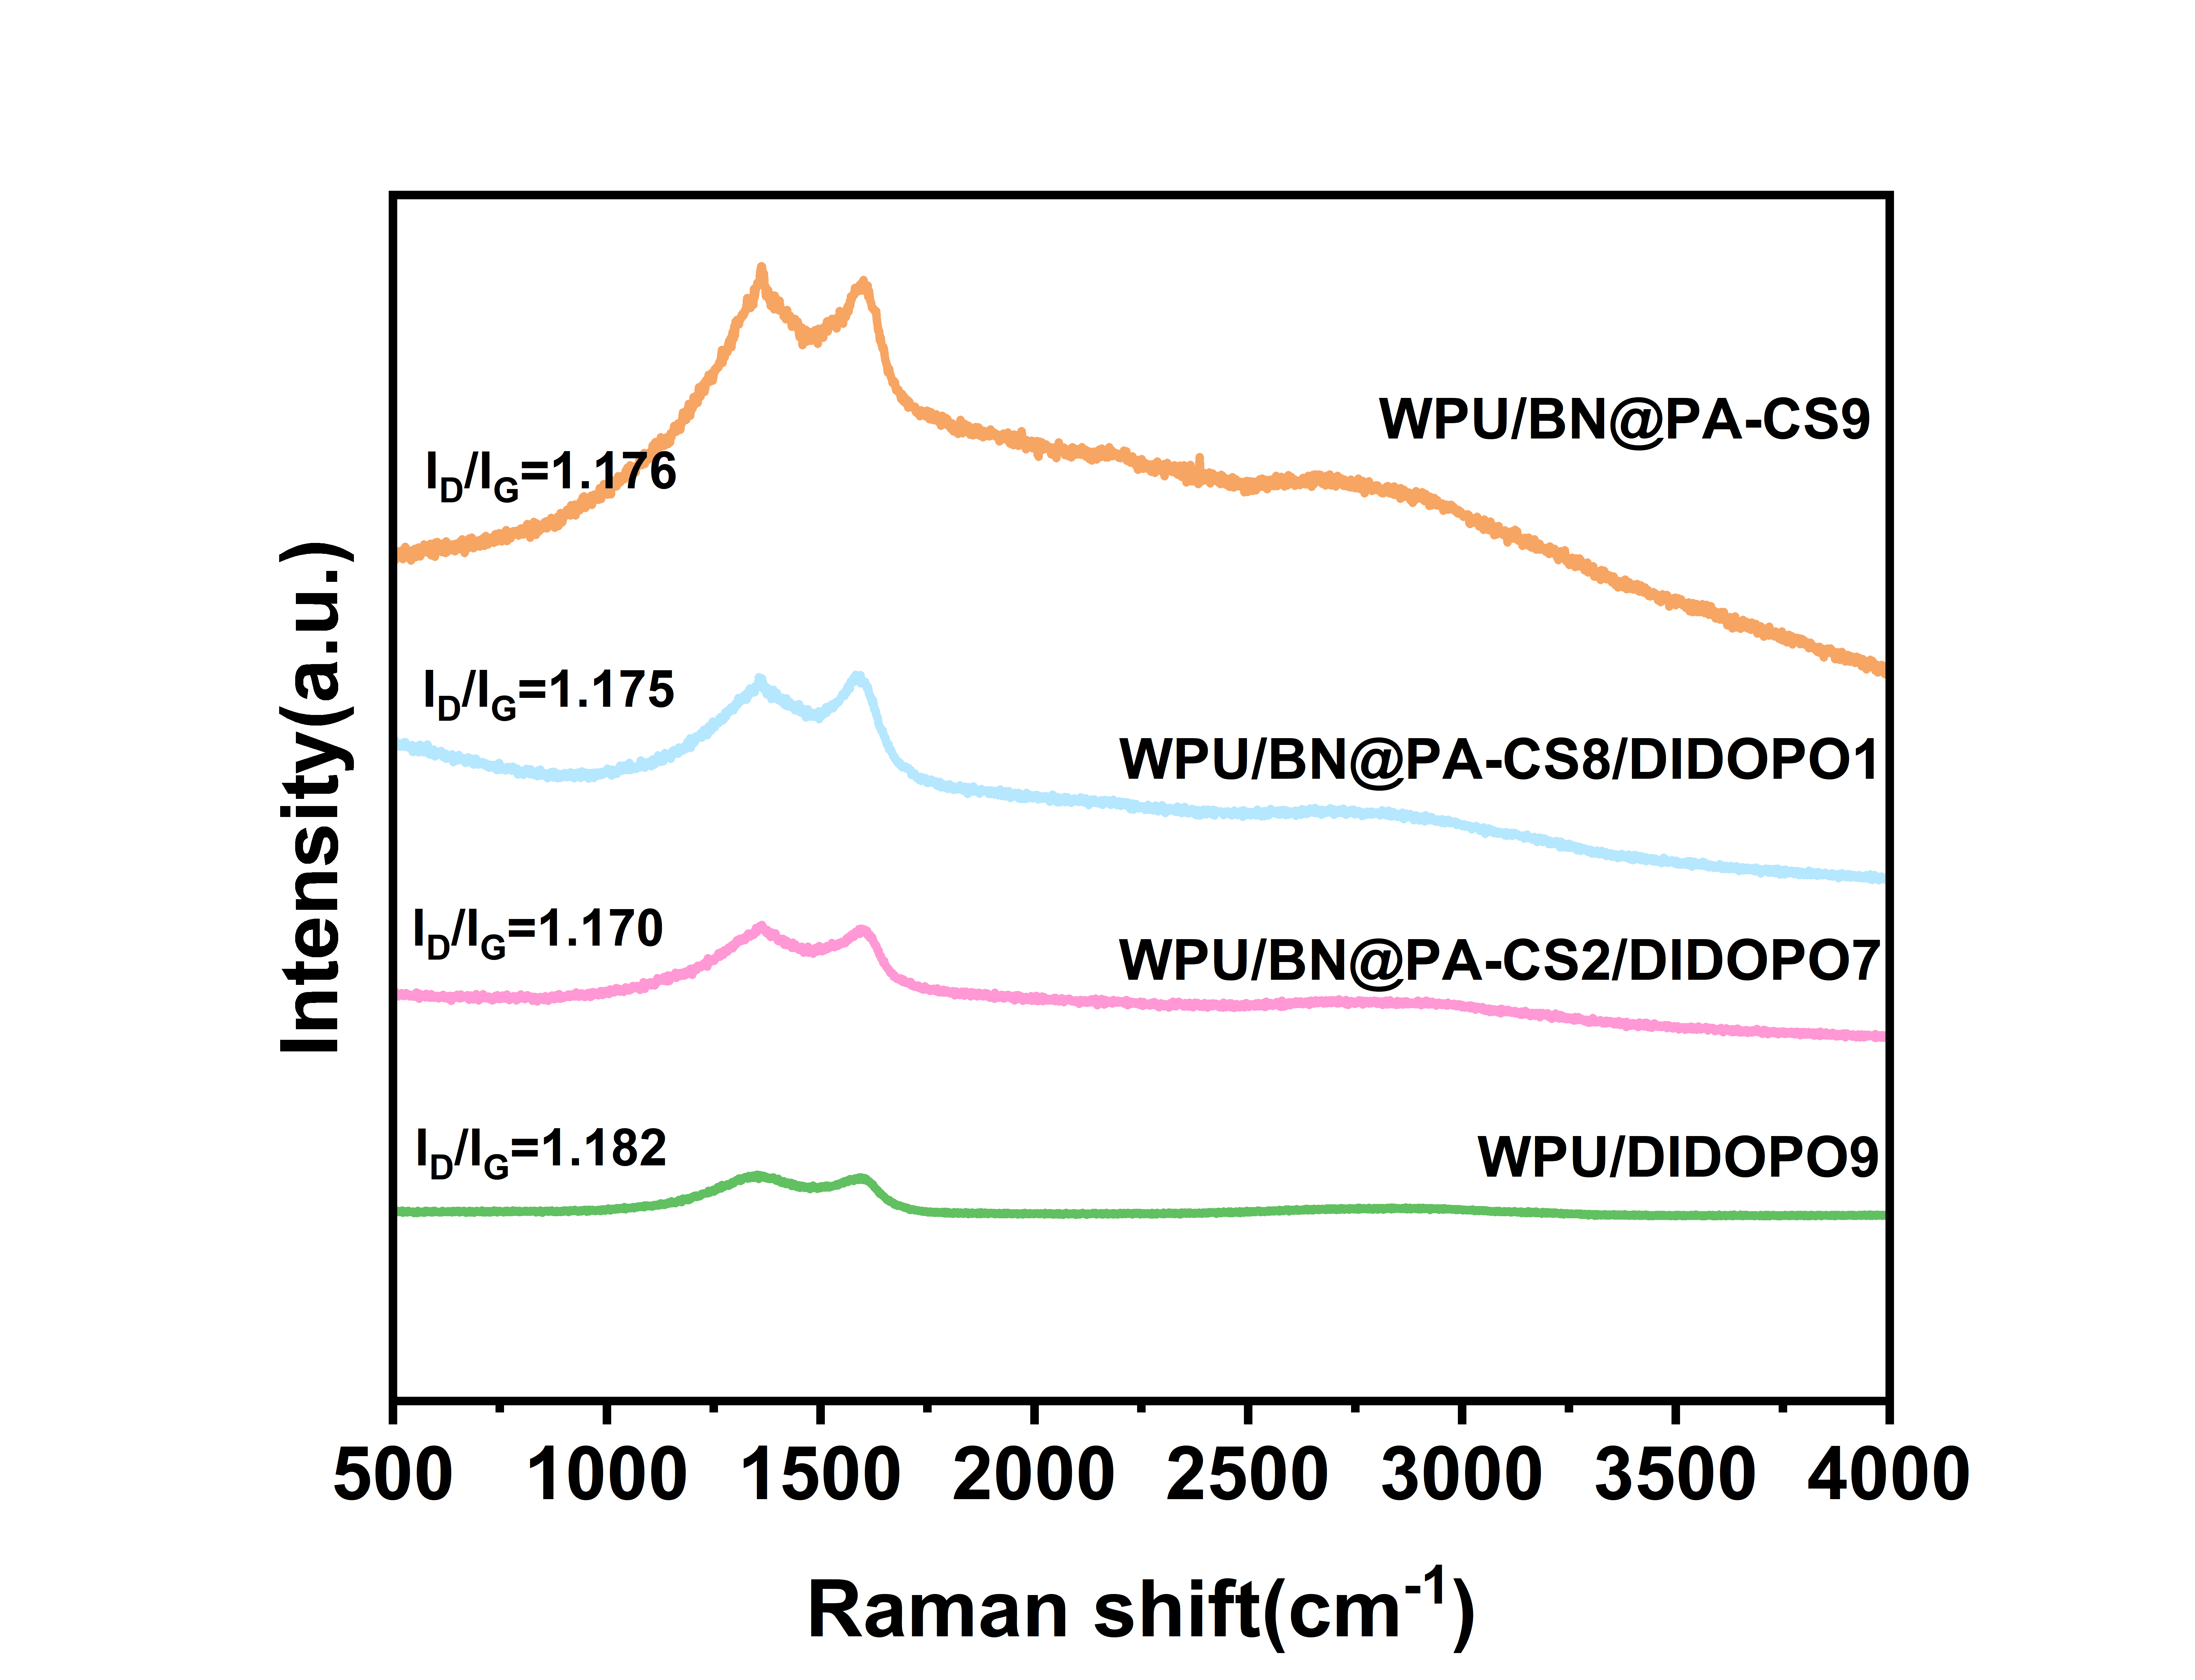 |
| --- |

Fig. S4 The Raman spectroscopy spectrum of the WPU composite material
