# Supplementary material
Source: Research Square preprint supplement (doi:10.21203/rs.3.rs-9885038/v1)

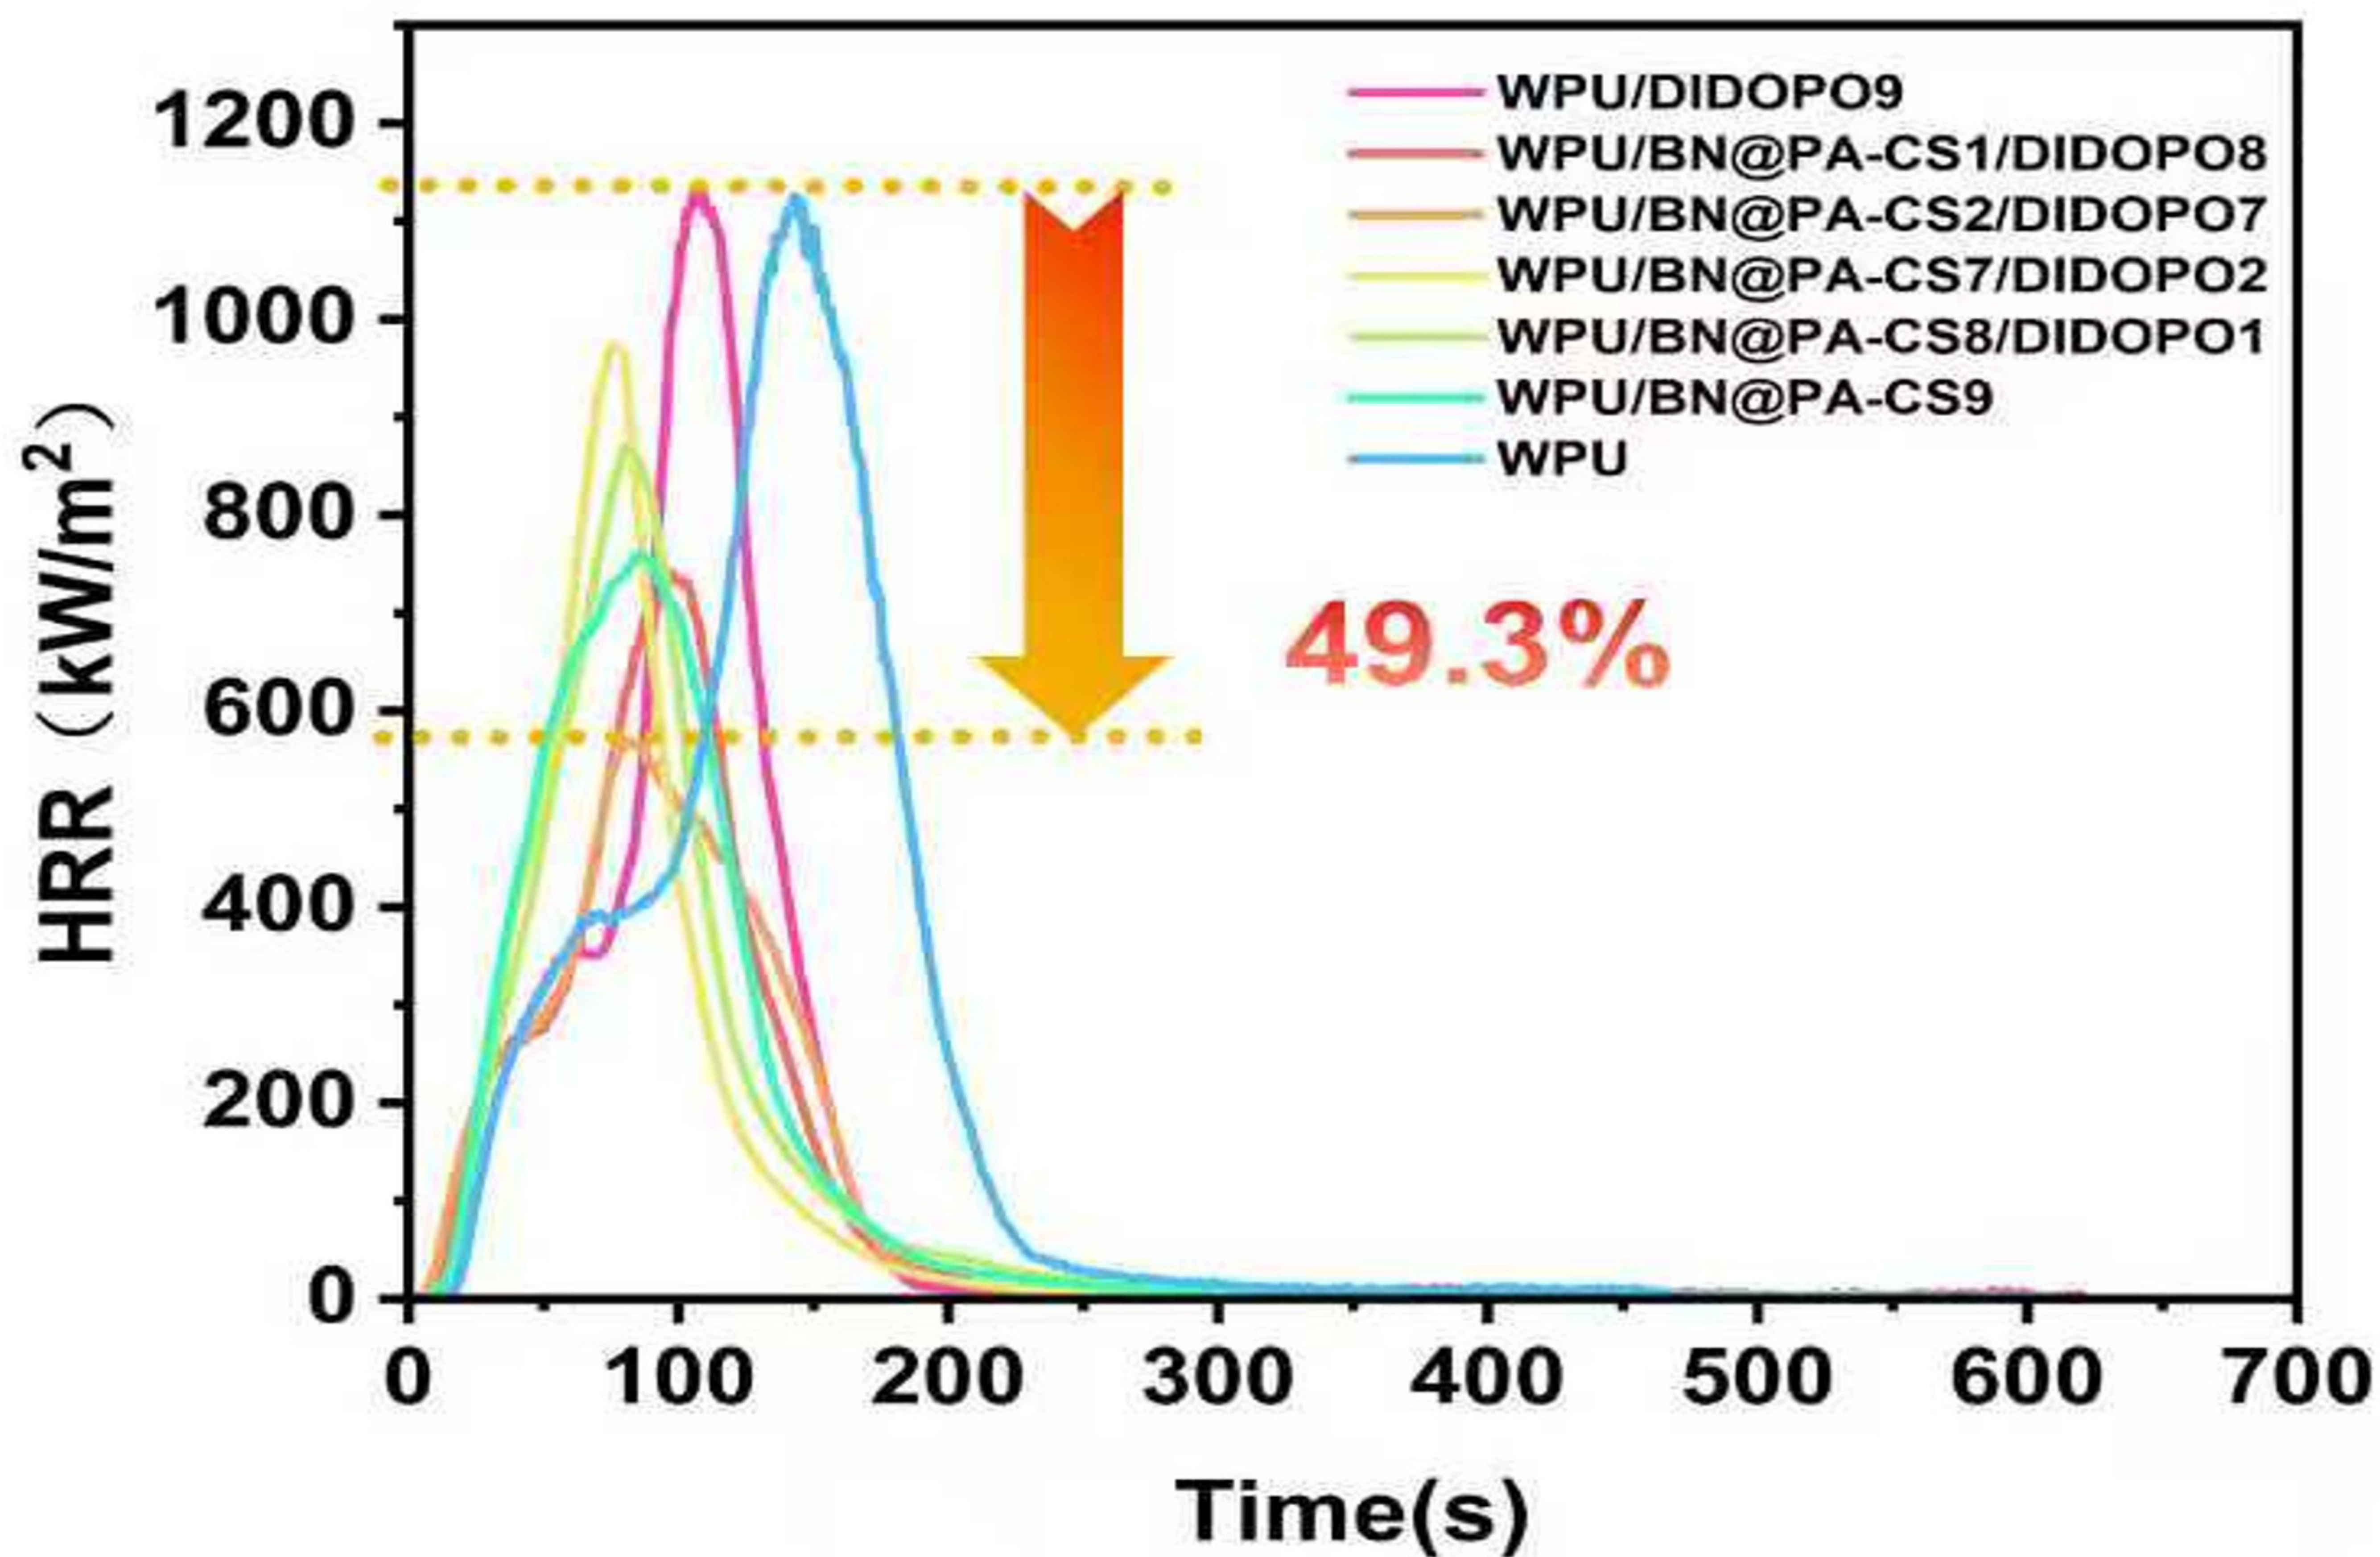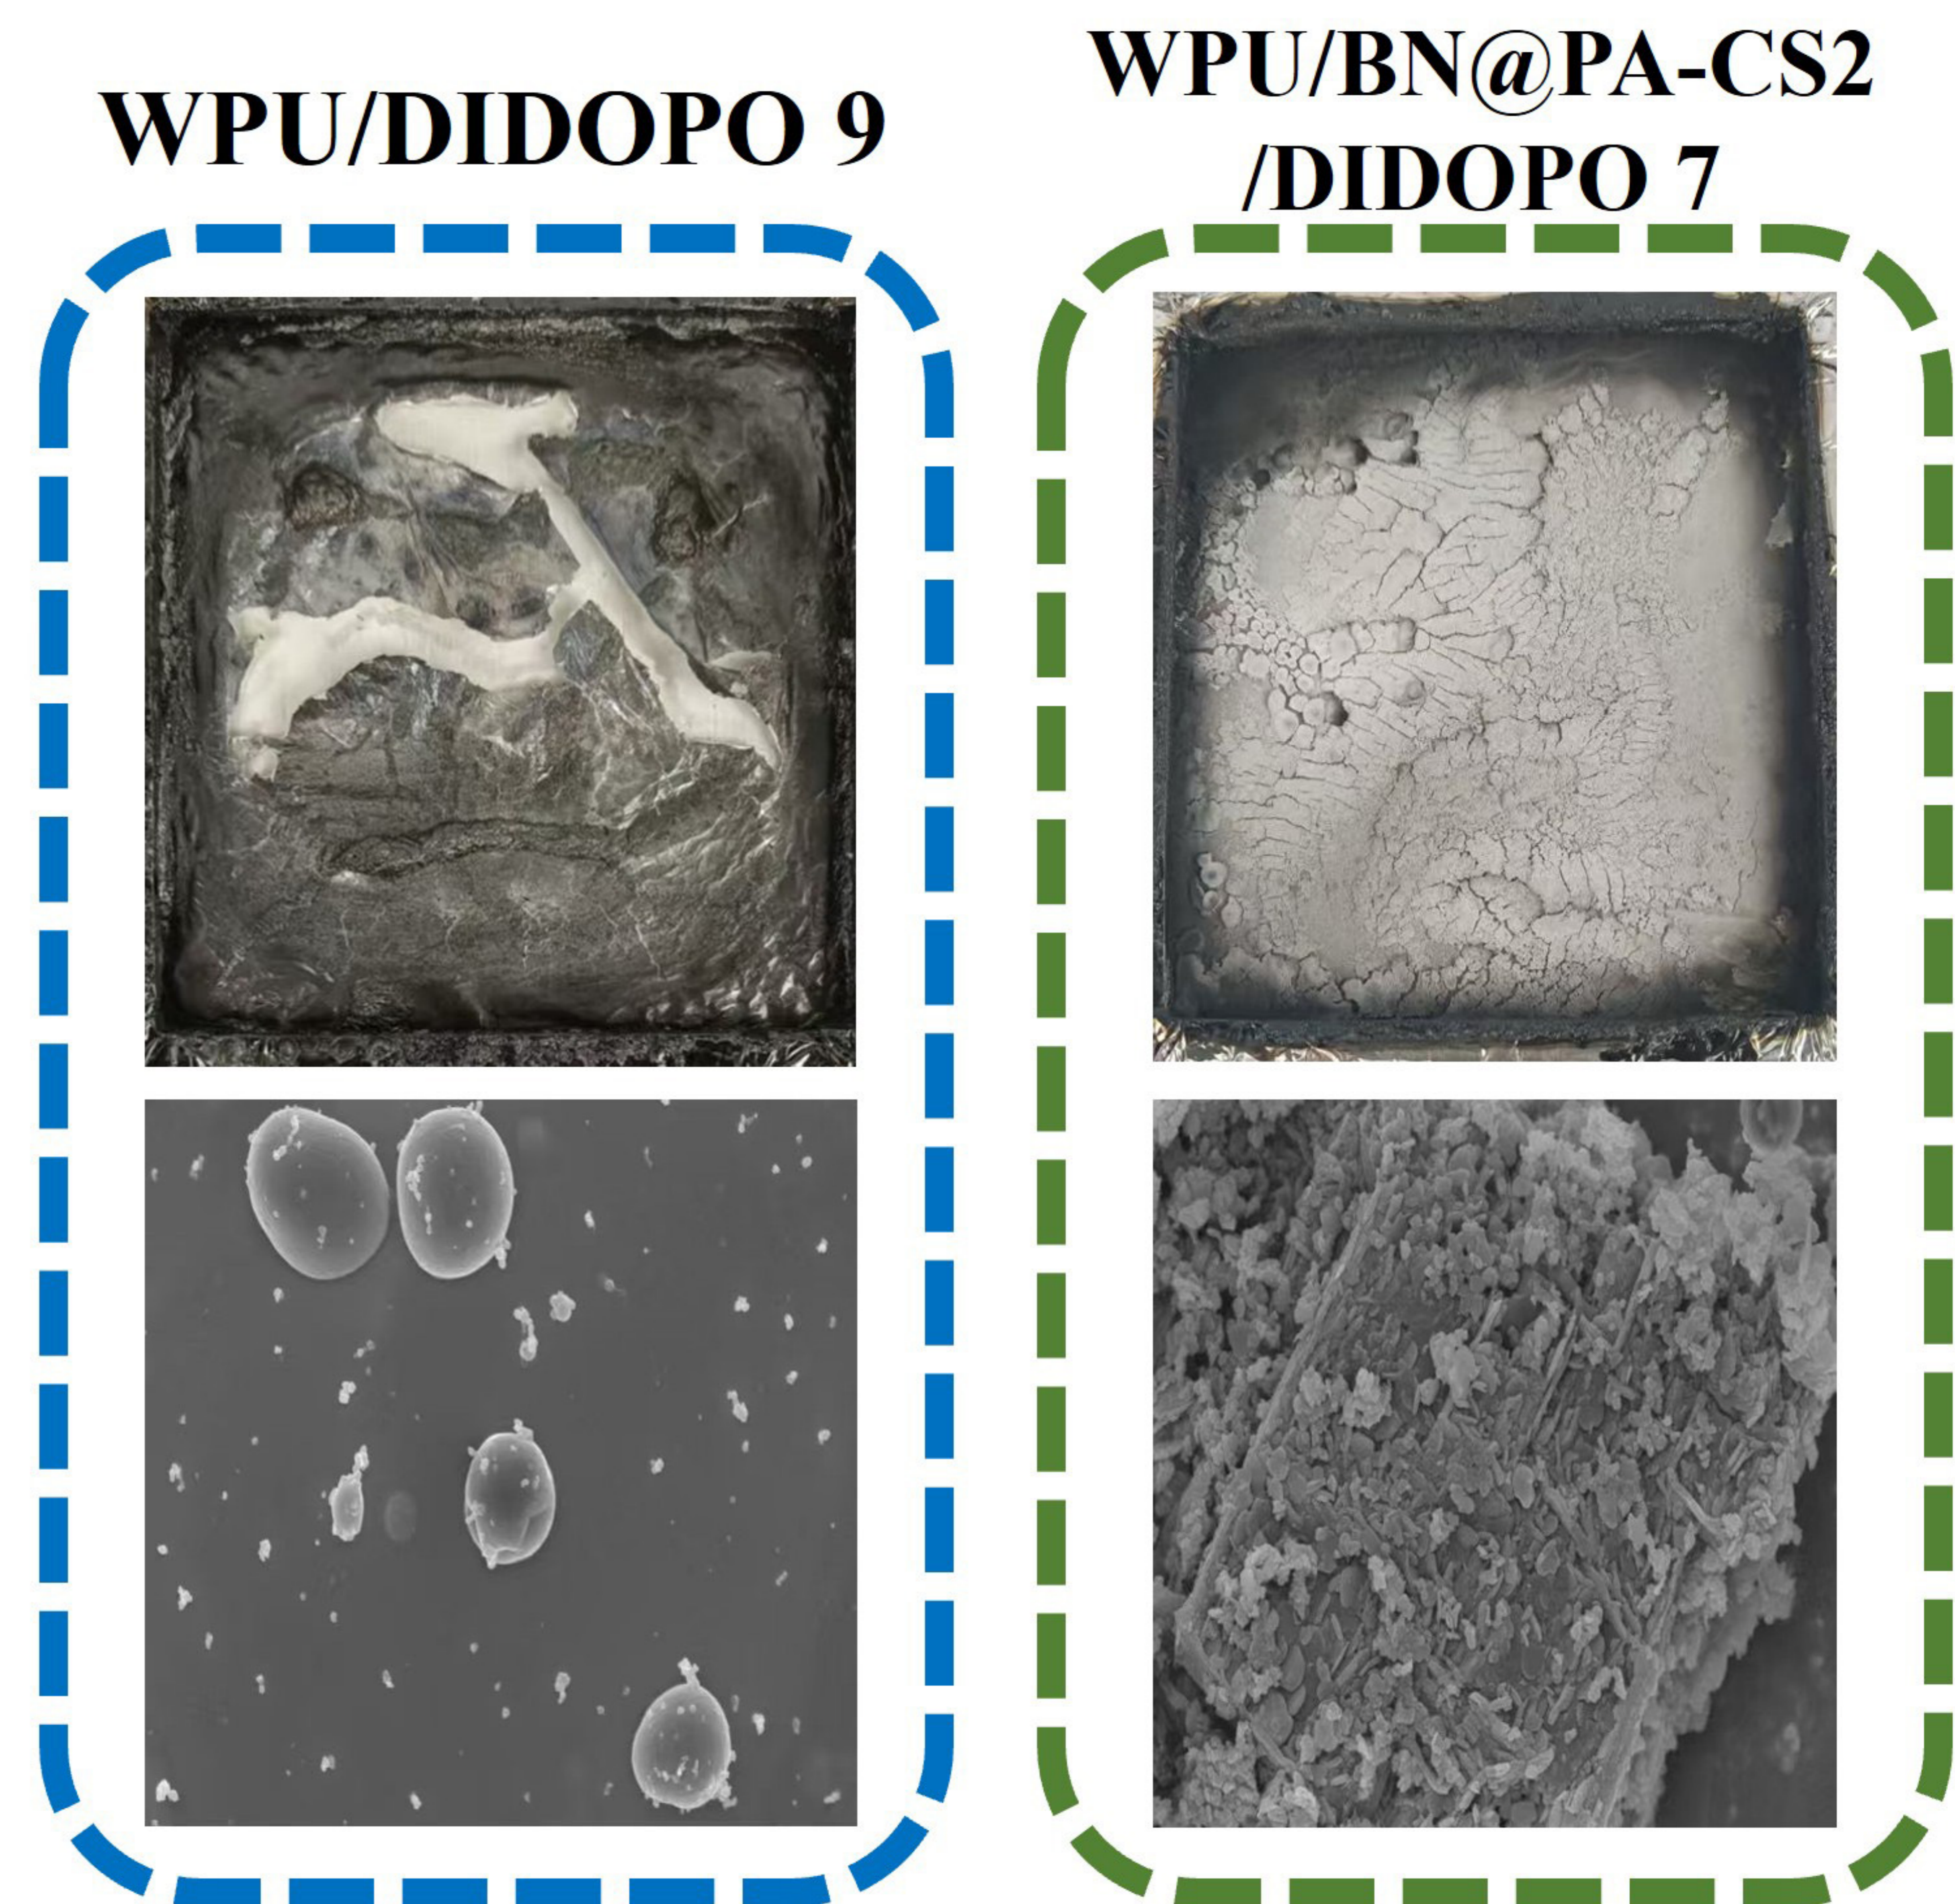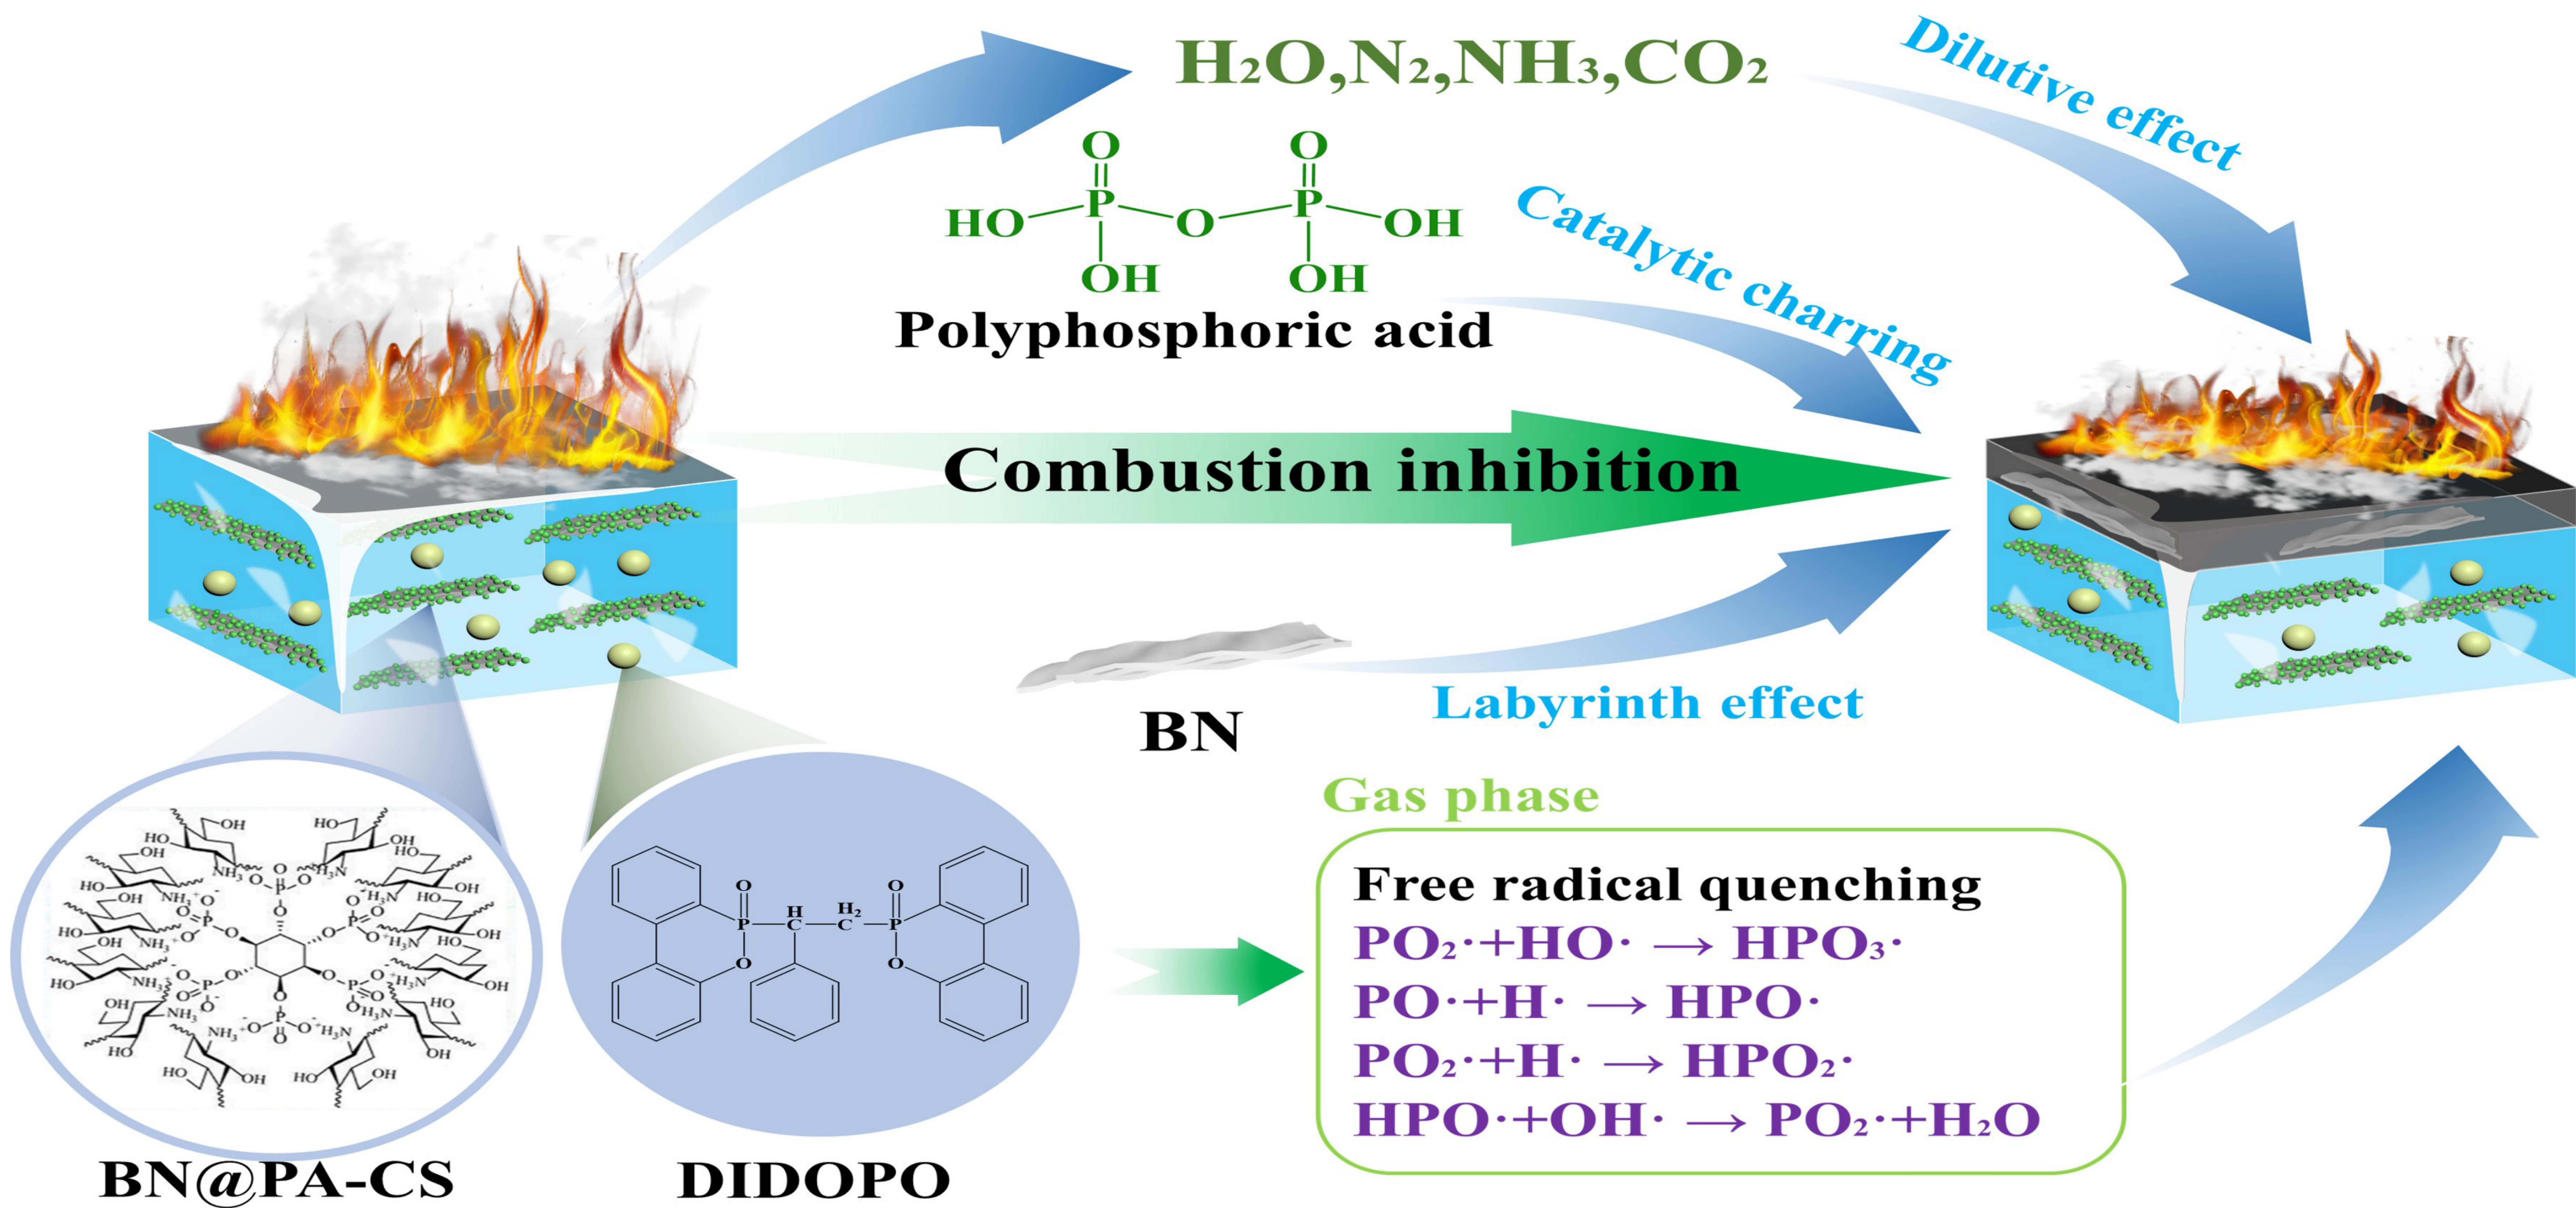

Supplement: Supplementary file 2 [file f7a830057170c26be69fb623.pdf]
